# Supplementary material for: The seaweed resources of Peru
Source: publisher site journal article supplement (doi:10.1515/bot-2020-0026), 2020-08-01
Supplement: Supplementary file 1 [file j_bot-2020-0026_suppl.docx]

|  |
| --- |

**Supplementary material**

**The seaweed resources of Peru**

José Avila-Peltroche and Jaraj Padilla-Vallejos

DOI 10.1515/bot-2020-0026

| **Supplementary Table S1:** Chlorophyta reported from Peru, with their valid names, authorities and previous record reported under their synonym(s). Invalidity of taxa and synonymy was based on AlgaeBase (Guiry and Guiry 2019, 2020) and INA Database (Silva 2019). Type localities of the species, if found in Peru, are also listed. Biogeographical units considered for distribution are according Ibanez-Erquiaga et al. (2018). | | | | | | | | | |
| --- | --- | --- | --- | --- | --- | --- | --- | --- | --- |
|  |  |  |  |  |  | | |  |  |
| **List No.** | **Family** | **Currently Accepted Name** | **Synonym** | **Type locality** | **Distribution** | | | **Remarks** | **Reference** |
| **Panamic province** | **Transition zone** | **Humboldt province** |
| 1 | **Boodleaceae** | *Phyllodictyon anastomosans* (Harvey) Kraft & M.J.Wynne 1996 | *Struvea anastomosans* (Harvey) Piccone & Grunow ex Piccone |  | + | - | - |  | Acleto 1980 |
| 2 | **Bryopsidaceae** | *Bryopsis galapagensis* W.R.Taylor 1945 |  |  | + | - | - |  | Acleto 1980 |
| 3 | *Bryopsis indica* var. *triseriata* E.Y.Dawson 1963 |  |  | + | - | - |  | Acleto 1973 |
| 4 | *Bryopsis peruviana* W.R.Taylor 1947 |  | Paita, Piura | + | + | + | *B. peruviana* seems to be a luxuriant, lax and uncongested form of *B. rhizophora* from less violently wave-beaten habitat (Dawson et al. 1964). | Taylor 1947, Dawson et al. 1964 |
| 5 | *Bryopsis plumosa* (Hudson) C.Agardh 1823 |  |  | - | - | + |  | Dawson et al. 1964 |
| 6 | *Bryopsis rhizophora* M.Howe 1914 |  | Pescadores islands, Ancon, Lima | + | - | + |  | Howe 1914 |
| 7 | *Bryopsis pennata* var. *leprieurii* (Kützing) Collins & Hervey 1917 | *Bryopsis leprieurii* Kützing |  | - | + | + |  | Piccone 1886 |
| 8 | **Caulerpaceae** | *Caulerpa filiformis* (Suhr) Hering 1841 | *Caulerpa flagelliformis* var. *ligulata* Weber Bosse |  | - | + | + |  | Dawson et al. 1964 |
| 9 | *Caulerpa racemosa* (Forsskål) J.Agardh 1873 | *Caulerpa racemosa* var. *uvifera* (C.Agardh) J.Agardh |  | + | - | - |  | Acleto 1980 |
| 10 | **Cladophoraceae** | *Chaetomorpha aerea* (Dillwyn) Kützing 1849 | *Chaetomorpha crassa* (C.Agardh) Kützing |  | + | - | + | This species is cited as a synonym of *C. linum* by Jhon et al. (2003). | Collins 1915, Jhon et al. 2003 |
| 11 | *Chaetomorpha antennina* (Bory) Kützing 1847 |  |  | + | - | - |  | Acleto 1973 |
| 12 | *Chaetomorpha brachygona* Harvey 1858* |  |  | - | - | + | Taylor (1947) reports this species as *C. peruviana* var. *elongata.* | Taylor 1947, Dawson et al. 1964 |
| 13 | *Chaetomorpha cartilaginea* M.Howe 1914* |  | Chincha Islands, Ica | - | - | + |  | Howe 1914 |
| 14 | *Chaetomorpha linum* (O.F.Müller) Kützing 1845 |  |  | - | - | + |  | Collins 1915 |
| 15 | *Cladophora allantoides* (Montagne) Kützing 1849* |  |  | - | - | + | Only known from the type locality. | Dawson et al. 1964 |
| 16 | *Cladophora coelothrix* Kützing 1843 | *Cladophoropsis peruviana* M.Howe |  | + | - | - |  | Howe 1914, Dawson et al. 1964 |
| 17 | *Cladophora peruviana* (W.R.Taylor) E.Y.Dawson, Acleto & Foldvik 1964 | *Chaetomorpha peruviana* Taylor | Paita, Piura | - | + | + |  | Taylor 1947 |
| 18 | *Cladophora prolifera* (Roth) Kützing 1843 |  |  | + | - | - |  | Acleto 1980 |
| 19 | *Cladophora striolata* Kützing 1843* |  | Peru (without specific location) | ND | ND | ND |  | Kützing 1843 |
| 20 | *Cladophora vagabunda* (Linnaeus) Hoek 1963 | *Cladophora fascicularis* (Mertens ex C.Agardh) Kützing, |  | - | - | + | According to Dawson et al. (1964), this species is reported as *Cladophora hariotiana* by Howe (1914). | Howe 1914, Dawson et al. 1964 |
| 21 | *Rhizoclonium riparium* (Roth) Harvey 1849 |  |  | - | - | + |  | Dawson et al. 1964 |
| 22 | **Codiaceae** | *Codium foveolatum* M.Howe 1914 |  | Lobos de Tierra island, Lambayeque | - | - | + | This species has never been found again in the type locality; however, it is well distributed in Galapagos Islands (Chacana et al. 2016). | Howe 1914, Chacana et al. 2016 |
| 23 | *Codium peruvianum* (M.Howe) Setchell 1937* | *Codium tomentosum* var. *peruvianum* M.Howe | Bay of Chilca (at a depth of 1.5 fathoms), Lima | + | + | + |  | Howe 1914 |
| 24 | *Codium tomentosum* Stackhouse 1797 |  |  | - | + | + |  | Bory 1826-1828, Carbajal et al. 2018 |
| 25 | **Derbesiaceae** | *Derbesia marina* (Lyngbye) Solier 1846 |  |  | - | - | + |  | Dawson et al. 1964 |
| 26 | **Gomontiaceae** | *Gomontia arrhiza* Hariot 1891 |  |  | - | - | + | Additional collections and culture studies from this shell-inhabiting green alga must be done in order to clarify its relationship with various green algae known by other names (Dawson et al. 1964). | Howe 1914, Dawson et al. 1964 |
| 27 | **Halimedaceae** | *Halimeda tuna* (J.Ellis & Solander) J.V.Lamouroux 1816 |  |  | - | + | - | No recent material has been collected since Barton's report (1901) from Sinclair's collection in Paita, Piura (Dawson et al. 1964). | Barton 1901, Dawson et al. 1964 |
| 28 | **Monostromataceae** | *Monostroma ecuadoreanum* W.R.Taylor 1945 |  |  | + | - | - |  | Dawson et al. 1964 |
| 29 | **Ulvaceae** | *Ulva compressa* Linnaeus 1753 | *Enteromorpha compressa* (Linnaeus) Nees |  | - | + | - |  | Taylor 1947, Dawson et al. 1964 |
| 30 | *Ulva flexuosa* Wulfen 1803 | *Enteromorpha lingulata* J.Agardh |  | - | + | + |  | Taylor 1947 |
| 31 | *Ulva hookeriana* (Kützing) H.S.Hayden, Blomster, Maggs, P.C.Silva, Stanhope & Waaland 2003 | *Enteromorpha bulbosa* (Suhr) Montagne |  | - | + | + |  | Howe 1914, Dawson et al. 1964 |
| 32 | *Ulva intestinalis* Linnaeus 1753 | *Enteromorpha intestinalis* (Linnaeus) Nees |  | - | - | + |  | Howe 1914, Dawson et al. 1964 |
| 33 | *Ulva lactuca* Linnaeus 1753 |  |  | - | - | + |  | Dawson et al. 1964 |
| 34 | *Ulva linza* Linnaeus 1753 | *Enteromorpha linza* (Linnaeus) J.Agardh |  | - | - | + |  | Howe 1914, Dawson et al. 1964 |
| 35 | *Ulva nematoidea* Bory 1828 | *Ulva fasciata* f. *costata* M.Howe, *Ulva costata* (M.Howe) Hollenberg |  | - | + | + |  | Howe 1914, Acleto 1980 |
| 36 | *Ulva papenfussi* Pham-Hoang Hô 1969 |  |  | - | + | + | According to Ramírez and Santelices (1991), the reasons for elevating *Ulva lactuca* var. *latissima* (or *papenfussi*) to species level are not clear. | Acleto 1973, Ramírez and Santelices 1991 |
| 37 | *Ulva prolifera* O.F.Müller 1778 | *Enteromorpha prolifera* (O.F.Müller) J.Agardh |  | - | - | + |  | Howe 1914, Dawson et al. 1964 |
| 38 | *Ulva rigida* C.Agardh 1823 | *Ulva lactuca* var. *rigida* (C.Agardh) Le Jolis |  | - | + | + |  | Howe 1914 |
| 39 | **Ulvellaceae** | *Entocladia strangulans* (M.Howe) Nielsen 1972* | *Endoderma strangulans* M.Howe | San Lorenzo Island, Lima | - | - | + |  | Howe 1914, Dawson et al. 1964 |
| 40 | *Ulvella ramosa* (N.L.Gardner) R.Nielsen, C.J.O'Kelly & B. Wysor | *Endophyton ramosum* N.L.Gardner |  | - | - | + |  | Dawson et al. 1964 |
| 41 | *Ulvella viridis* (Reinke) R.Nielsen, C.J.O'Kelly & B.Wysor 2013 |  |  | - | - | + | According to Ramírez and Santelices (1991), this species is reported as *Endoderma viride* f. *nitophylli* by Howe (1914). | Howe 1914, Ramírez and Santelices 1991 |

*Endemic species; ND, No data

**Supplementary Table S2:** Phaeophyceae reported from Peru, with their valid names, authorities and previous record reported under their synonym(s). Invalidity of taxa and synonymy was based on AlgaeBase (Guiry and Guiry 2019, 2020) and INA Database (Silva 2019). Type localities of the species, if found in Peru, are also listed. Biogeographical units considered for distribution are according Ibanez-Erquiaga et al. (2018).

| **List No.** | **Family** | **Currently Accepted Name** | **Synonym** | **Type locality** | **Distribution** | | | | **Remarks** | **Reference** |
| --- | --- | --- | --- | --- | --- | --- | --- | --- | --- | --- |
| **Panamic province** | **Transition zone** | | **Humboldt province** |
| 42 | **Acinetosporaceae** | *Feldmannia chitonicola* (De A.Saunders) Levring 1960 |  |  | - | | - | + |  | Acleto 1980 |
| 43 | *Feldmannia mitchelliae* (Harvey) H.-S.Kim 2010 | *Ectocarpus mitchelliae* Harvey, *Giffordia mitchelliae* (Harvey) Hamel |  | + | | - | + |  | Collins 1915, Acleto 1980, Alvítez and Rodríguez 2005 |
| 44 | **Bachelotiaceae** | *Bachelotia antillarum* (Grunow) Gerloff 1959 |  |  | + | | - | - |  | Acleto 1973, Alvítez and Rodríguez 2005 |
| 45 | **Chordariaceae** | *Myriogloea chilensis* (Montagne) A.H.Llaña 1948 |  |  | - | | - | + |  | Ramírez and Santelices 1991 |
| 46 | *Myriogloea grandis* (M.Howe) Levring 1939 | *Myriocladia grandis* Howe | Ancon, Lima | - | | - | + | This species may be a synonym of *Myriogloea chilensis* (Peters and Muller 1986, Ramírez and Santelices 1991). | Howe 1914, Peters and Muller 1986, Ramírez and Santelices 1991 |
| 47 | *Streblonema cokeri* M.Howe 1914 |  | Lobos de Afuera Island, Lambayeque | - | | - | + |  | Howe 1914, Dawson et al. 1964, Alvítez and Rodríguez 2005 |
| 48 | *Microspongium radians* (M.Howe) A.F.Peters 2003* | *Streblonema radians* M.Howe | Callao | - | | - | + |  | Howe 1914, Dawson et al. 1964, Alvítez and Rodríguez 2005 |
| 49 | *Kuetzingiella elachistaeformis* (Heydrich) M.Balakrishnan & Kinkar 1981 | *Ectocarpus elachistaeformis* Heydrich |  | - | | - | + |  | Araujo (1971), Alvítez and Rodríguez (2005) |
| 50 | **Desmarestiaceae** | *Desmarestia herbacea* subsp. *firma* (C.Agardh) A.F.Peters, E.C.Yang, F.C.Küpper & Prud’homme 2014 | *Desmarestia firma* (C.Agardh) Skottsberg |  | - | | - | + |  | Acleto 1973, Alvítez and Rodríguez 2005 |
| 51 | *Desmarestia herbacea* (Turner) J.V.Lamouroux 1813 |  |  | - | | + | + |  | Acleto 1973, Alvítez and Rodríguez 2005 |
| 52 | *Desmarestia ligulata* (Stackhouse) J.V.Lamouroux 1813 |  |  | - | | - | + |  | Jhul-Noodt 1958 |
| 53 | *Desmarestia munda* Setchell & N.L.Gardner 1924 |  |  | - | | + | + | Yang et al. (2014) consider this species as synonym of *Desmarestia herbacea.* | Taylor 1947, Alvítez and Rodríguez 2005, Yang et al. 2014 |
| 54 | *Desmarestia herbacea* subsp. *peruviana* (Montagne) A.F.Peters, E.C.Yang, F.C.Küpper & Prud’homme 2014* | *Desmarestia peruviana* Montagne | Callao | - | | + | + | This species could be the same as *Desmarestia ligulata* in Peru (Howe 1914, Dawson et al. 1964). | Montagne 1837, Howe 1914, Dawson et al. 1964, Alvítez and Rodríguez 2005 |
| 55 | *Desmarestia tropica* W.R.Taylor 1945 |  |  | - | | - | + |  | Acleto 1973, Alvítez and Rodríguez 2005 |
| 56 | **Dictyotaceae** | *Dictyopteris cokeri* (M.Howe) W.R.Taylor 1945 | *Neurocarpus cokeri* Howe | Bay of Sechura, Piura | - | | + | + |  | Howe 1914, Dawson et al. 1964, Alvítez and Rodríguez 2005 |
| 57 | *Dictyota dichotoma* (Hudson) J.V.Lamouroux 1809 |  |  | + | | - | + | The presence of *D. dichotoma* in the Pacific Ocean has been questioned (South and Skelton 2003, Tsuda 2004) and its presence in Peru must be confirmed (Dawson et al. 1964). | Howe 1914, Dawson et al. 1964, South and Skelton 2003, Tsuda 2004, Alvítez and Rodríguez 2005, Arakaki et al. 2018a |
| 58 | *Dictyota kunthii* (C.Agardh) Greville 1830 | *Glossophora kunthii* (C.Agardh) J.Agardh | Syntype localities: Callao; Huanchaco, Trujillo, La Libertad | - | | + | + |  | Agardh 1821, Dawson et al. 1964, Alvítez and Rodríguez 2005 |
| 59 | *Padina durvillei* Bory 1827 |  |  | + | | + | - |  | Dawson et al. 1964, Alvítez and Rodríguez 2005 |
| 60 | *Spatoglossum crispatum* M.Howe 1914 |  | Lobos de Afuera Island, Lambayeque | + | | + | + | According to Dawson et al. (1964), this species was reported by Taylor (1947) as *Spatoglossum veleroae.* | Howe 1914, Taylor 1947, Dawson et al. 1964, Alvítez and Rodríguez 2005 |
| 61 | **Ectocarpaceae** | *Ectocarpus siliculosus* (Dillwyn) Lyngbye 1819 |  |  | - | | - | + |  | Peters et al. 2004 |
| 62 | **Laminariaceae** | *Macrocystis pyrifera* (Linnaeus) C.Agardh | *Macrocystis pyrifera* var. *humboldtii* Bonpland, *Macrocystis integrifolia* Bory |  | + | | + | + |  | Howe 1914, Dawson et al. 1964, Alvítez and Rodríguez 2005 |
| 63 | **Lessoniaceae** | *Eisenia cokeri* M.Howe 1914 |  | La Punta, Callao | + | | + | + | This species might be conspecific with *Eisenia arborea* from California based on its morphology (Dawson et al. 1964). | Howe 1914, Alvítez and Rodríguez 2005 |
| 64 | *Eisenia gracilis* E.Y.Dawson, Acleto & Foldvik 1964* |  | Bay of San Juan, Ica, Peru | - | | - | + | This species might have originated from *E. cokeri* stocks unhabiting deep waters (Dawson et al. 1964). | Dawson et al. 1964, Alvítez and Rodríguez 2005 |
| 65 | *Lessonia nigrescens* Bory 1826 |  |  | - | | - | + | *Lessonia berteroana* should be used instead of *L. nigrescens* for samples from northern areas on the temperate coast of Pacific South America (southern Peru to central Chile) (Gonzales et al. 2012). | Howe 1914, Dawson et al. 1964, Alvítez and Rodríguez 2005, González et al. 2012 |
| 66 | *Lessonia trabeculata* Villouta & Santelices 1986 |  |  | - | | - | + |  | Cho et al. 2006 |
| 67 | **Sargassaceae** | *Sargassum ecuadoreanum* W.R.Taylor 1945 |  |  | + | | + | - |  | Dawson et al. 1964, Alvítez and Rodríguez 2005 |
| 68 | *Sargassum pacificum* Bory 1828 |  |  | - | | - | + |  | Howe 1914, Dawson et al. 1964, Alvítez and Rodríguez 2005 |
| 69 | **Scytosiphonaceae** | *Dactylosiphon durvillei* (Bory de Saint-Vincent) Santiañez, K.M.Lee, S.M.Boo & Kogame 2018 | *Asperococcus durvillei* Bory |  | - | | - | + | Acleto (1973) reported this species as *Utriculidium durvillaei*, considering *A. durvillaei* (=*Dactylosiphon durvillei*) as its basionym. However, Wynne (1999) indicated that both should be treated as separated species, and that *U. durvillaei* occurs only in the subantartic and antartic area. Therefore, this report is considered as *Asperococcus durvillaei* (=*Dactylosiphon durvillei*). | Acleto 1973, Wynne 1999, Alvítez and Rodríguez 2005 |
| 70 | *Colpomenia sinuosa* (Mertens ex Roth) Derbès & Solier 1851 |  |  | + | | + | + |  | Howe 1914, Dawson et al. 1964, Alvítez and Rodríguez 2005 |
| 71 | *Colpomenia tuberculata* D.A.Saunders 1898 |  |  | - | | + | + |  | Wynne and Norris 1976, Ramírez et al. 2015 |
| 72 | *Petalonia fascia* (O.F.Müller) Kuntze | *Petalonia debilis* (Kützing) Derbès & Solier |  | + | | - | + |  | Howe 1914, Dawson et al. 1964, Alvítez and Rodríguez 2005 |
| 73 | *Scytosiphon lomentaria* (Lyngbye) Link 1833 |  |  | - | | - | + |  | Acleto 1973, Alvítez and Rodríguez 2005 |
| 74 | **Sphacelariaceae** | *Sphacelaria tribuloides* Meneghini 1840 |  |  | - | | - | + |  | Acleto 1973, Alvítez and Rodríguez 2005 |
| 75 | **Stypocaulaceae** | *Halopteris paniculata* (Suhr) Prud'homme 1972 | *Halopteris gracilescens* (J.Agardh) Womersley |  | - | | - | + |  | Acleto 1980, Alvítez and Rodríguez 2005 |

*Endemic species

**Supplementary Table S3:** Rhodophyta reported from Peru, with their valid names, authorities and previous record reported under their synonym(s). Invalidity of taxa and synonymy was based on AlgaeBase (Guiry and Guiry 2019, 2020) and INA Database (Silva 2019). Type localities of the species, if found in Peru, are also listed. Biogeographical units considered for distribution are according Ibanez-Erquiaga et al. (2018).

| **List No.** | **Family** | **Currently Accepted Name** | **Synonym** | **Type locality** | **Distribution** | | | **Remarks** | **References** |
| --- | --- | --- | --- | --- | --- | --- | --- | --- | --- |
| **Panamic province** | **Transition zone** | **Humboldt province** |
| 76 | **Acrochaetiaceae** | *Acrochaetium catenulatum*M.Howe 1914 |  | La Punta, Callao | - | - | + |  | Howe 1914 |
| 77 | *Acrochaetium clandestinum* (Montagne) M.Howe 1914 | *Callithamnion clandestinum* Montagne | Callao | - | - | + |  | Montagne 1837 |
| 78 | *Acrochaetium distichosporum* E.Y.Dawson, Acleto & Foldvik 1964* |  | Talara, Piura | + | - | - |  | Dawson et al. 1964 |
| 79 | *Acrochaetium pacificum* Kylin 1925 |  |  | + | - | - |  | Dawson et al. 1964 |
| 80 | *Acrochaetium polysporum* M.Howe 1914 |  | Pescadores Islands, Ancon, Lima | - | - | + |  | Howe 1914 |
| 81 | **Ahnfeltiaceae** | *Ahnfeltia durvillei* var. *implicata* (Kützing) M.Howe 1914 |  |  | - | - | + | This variety has not been included in later checklists since its original description (Dawson et al. 1964, Ramírez and Santelices 1991). Howe (1914) provides a description and a picture of this variety, distinguishing it from the typical form. Althought *A. durvillei* has been transferred to the genus *Gymnogongrus* by Calderon and Boo (2017), this variety is currently accepted taxonomically (Guiry and Guiry 2020). | Howe 1914, Dawson et al. 1964, Ramírez and Santelices 1991, Calderon and Boo 2017, Guiry and Guiry 2020 |
| 82 | *Ahnfeltia plicata* (Hudson) Fries 1836 | *Sphaerococcus*  *plicatus* (Hudson) C.Agardh |  | - | - | + | This specimen has not been verified or substantiated by other collections since Montagne's report in Callao (Dawson et al. 1964). | Montagne 1839, Dawson et al. 1964 |
| 83 | **Bangiaceae** | *Bangia fuscopurpurea* (Dillwyn) Lyngbye 1819 |  |  | - | - | + |  | Araujo 1971, Acleto 1973 |
| 84 | *Porphyra crispata* Kjellman 1897 |  |  | + | - | - | Acleto (1984) reported this species following Ueda (1932). However, the type specimen corresponds to a green algae, *Monostroma nitidum* Wittrock (Yoshida 1997). Ueda (1932) applied this name to species of *Porphyra* distributed in the southern parts of Japan, giving detailed descriptions and figures. Therefore, a new name is necessary for *P. crispata sensu* Ueda (Guiry and Guiry 2020). | Ueda 1932, Acleto 1984, Yoshida 1997, Guiry and Guiry 2020 |
| 85 | *Porphyra umbilicalis* Kützing |  |  | - | - | + | This species was originally reported in Peru as *Porphyra laciniata* (Lightfoot) C.Agardh by Piccone (1886). According to Dawson et al. (1964), specimens identified as *P. umbilicalis* may correspond to *Pyropia columbina* or a similar species (Dawson et al. 1964). The confirmed distribution of *P. umbilicalis* is currently the North Atlantic (Brodie et al. 2008). | Piccone 1886, Taylor 1947, Dawson et al. 1964, Brodie et al. 2008 |
| 86 | *Pyropia columbina* (Montagne) W.A.Nelson 2011 | *Porphyra*  *columbina*  Montagne; *Porphyra kunthiana* Kützing |  | + | + | + |  | Dawson et al. 1964, Acleto and Endo 1977 |
| 87 | *Pyropia orbicularis* M.E.Ramírez, L.Contreras Porcia & M.-L.Guillemin 2014 |  |  | - | - | + |  | Márquez-Corigliano et al. 2019 |
| 88 | *Pyropia pseudolanceolata* (V.Krishnamurthy) S.C.Lindstrom 2011 | *Porphyra pseudolanceolata* V.Krishnamurthy |  | - | - | + |  | Acleto and Endo 1977 |
| 89 | *Pyropia suborbiculata* (Kjellman) J.E.Sutherland, H.G.Choi, M.S.Hwang & W.A.Nelson 2011 |  |  | - | - | + |  | Márquez-Corigliano et al. 2019 |
| 90 | *Pyropia tenera* (Kjellman) N.Kikuchi, M.Miyata, M.S.Hwang & H.G.Choi 2011 | *Porphyra tenera* Kjellman |  | - | - | + |  | Acleto and Endo 1977 |
| 91 | *Pyropia thuretii* (Setchell & E.Y.Dawson) J.E.Sutherland, L.E.Aguilar Rosas & R. Aguilar Rosas 2011 | *Porphyra thuretii* Setchell & E.Y.Dawson |  | - | + | + |  | Dawson et al. 1964, Acleto and Endo 1977 |
| 92 | **Caulacanthaceae** | *Montemaria horridula* (Montagne) A.B.Joly & Alveal 1970 |  |  | - | - | + |  | Franco-León et al. 1995 |
| 93 | **Ceramiaceae** | *Antithamnion densum* (Suhr) M.Howe 1914 | *Callithamnion*  *densum*Suhr | From Peru but no specific site was indicated | - | - | + |  | Suhr 1840, Howe 1914 |
| 94 | *Centroceras clavulatum* (C.Agardh) Montagne 1846 | *Ceramium*  *clavulatum*  C.Agardh | Callao | - | + | + |  | Agardh 1822 |
| 95 | *Ceramium codii* (H.Richards) Mazoyer 1938 |  |  | - | - | + |  | Arakaki et al. 2018b |
| 96 | *Ceramium suhrianum* P.C.Silva 1996 | *Ceramium miniatum* Suhr ex J.Agardh | Probably from Callao | - | - | + | There are some doubts about the locality of the original material (Howe 1914; Dawson et al. 1964). | Agardh 1851-1863, Howe 1914, Dawson et al. 1964 |
| 97 | *Ceramium virgatum* Roth 1797 | *Ceramium rubrum* C.Agardh |  | - | - | + |  | Howe 1914 |
| 98 | *Pterothamnion orbignianum* (Montagne) Nägeli 1862* | *Callithamnion orbignianum* Montagne; *Antithamnion orbignianum* (Montagne) De Toni; *Platythamnion orbignianum* (Montagne) M.Howe | Callao | - | - | + |  | Montagne 1839, Howe 1914, Dawson et al. 1964 |
| 99 | *Tetrathamnion myurum* (Suhr) Athanasiadis 1996* | *Callithamnion myurum* Suhr | Lima | - | - | + |  | Suhr 1840, Kützing 1851-1869, Howe 1914, Dawson et al. 1964, Arakaki et al. 2018b |
| 100 | **Champiaceae** | *Champia lumbricalis* (Linnaeus) Desvaux 1809 |  |  | ND | ND | ND | The presence of this species in Peru is doubtful. According tho Howe (1914), *C. lumbricalis* was originally reported in Peru by Agardh without indicating a specific site. However, the same autor omitted the peruvian reference in a later work. Since then, this species has not been found in Peru (Howe, 1914, Dawson et al. 1964, Acleto 1973, Acleto 1980, Acosta et al. 2001). | Howe 1914, Dawson et al. 1964, Acleto 1973, Acleto 1980, Acosta et al. 2001, |
| 101 | *Champia vieillardii* Kützing 1866 |  |  | + | - | - |  | Acleto 1980 |
| 102 | *Gastroclonium cylindricum* Santelices, I.A.Abbott & Ramírez 1989 |  |  | - | - | + |  | Arakaki et al. 2018b |
| 103 | *Gastroclonium pacificum* (E.Y.Dawson) C.F.Chang & B.M.Xia 1978 |  |  | - | - | + |  | Franco-León et al. 1995, Acosta et al. 1998 |
| 104 | **Colaconemataceae** | *Colaconema variabile* (K.M.Drew) J.N.Norris 2014 | *Acrochaetium variabile* (K.M.Drew) G.M.Smith |  | - | - | + | This species might be conspecific with *A. pacificum* (Abbott and Hollenberg 1976). | Dawson et al. 1964, Abbott and Hollenberg 1976 |
| 105 | **Corallinaceae** | *Corallina officinalis* var. *chilensis* (Decaisne) Kützing 1858 |  |  | - | - | + | According to Alejo et al. (2019), *C. officinalis* var. *chilensis* was elevated to specific status by Williamson et al. (2016). However, the original publication does not mention this change. Mitogenome data distinguish *C. officinalis* and *C. officinalis* var. *chilensis* as separated species (Alejo et al. 2019). This species has been reported by Howe (1914) as *Corallina officinalis* var. *collabens* (Dawson et al. 1964). | Pilger 1908, Howe 1914, Dawson et al. 1964, Williamson et al. 2016, Alejo et al. 2019 |
| 106 | *Corallina ferreyrae* E.Y.Dawson, Acleto & Foldvik 1964 |  | Pucusana, Lima | - | - | + |  | Dawson et al. 1964, Bustamante et al. 2019a |
| 107 | *Jania crassa* J.V.Lamouroux 1821 | *Jania natalensis* Harvey |  | + | - | - |  | Dawson et al. 1964 |
| 108 | *Pneophyllum nicholsii* (Setchell & L.R.Mason) P.C.Silva & P.W.Gabrielson 2004 | *Heteroderma*  *nicholsii*Setchell & L.R.Mason |  | + | - | - |  | Dawson et al. 1964 |
| 109 | **Cystocloniaceae** | *Hypnea spicifera* (Suhr) Harvey 1847 |  |  | - | - | + |  | Acosta et al. 2001 |
| 110 | *Hypnea valentiae* (Turner) Montagne 1841 |  |  | + | - | + | According to Dawson et al. (1964), this species has been reported as *Hypnea musciformis* by Howe (1914). | Montagne 1839, Howe et al. 1914, Dawson et al. 1964 |
| 111 | **Delesseriaceae** | *Acrosorium ciliolatum* (Harvey) Kylin 1924 |  |  | - | - | + |  | Arakaki et al. 2018b |
| 112 | *Acrosorium fragile* W.R. Taylor 1945 |  |  | - | - | + |  | Araujo 1971 |
| 113 | *Austrofolium hassleri* (W.R.Taylor) M.J.Wynne 1988* | *Hemineura hassleri*  W.R.Taylor | Paita, Piura | - | + | + |  | Taylor 1947 |
| 114 | *Caloglossa leprieurii* (Montagne) G.Martens 1869 |  |  | + | - | - |  | Howe 1914, Kamiya et al. 2003 |
| 115 | *Caloglossa monosticha* M.Kamiya 1997 |  |  | + | - | - |  | Kamiya et al. 2003 |
| 116 | *Caloglossa ogasawaraensis*Okamura 1897 |  |  | + | - | - |  | West 1991 |
| 117 | *Caloglossa stipitata* E.Post 1936 |  |  | + | - | - |  | West 1991 |
| 118 | *Cryptopleura cryptoneuron* (Montagne) W.R.Taylor 1947* | *Nitophyllum cryptoneuron* (Montagne) De Toni | Callao | + | + | + |  | Taylor 1947, Howe 1914, Dawson et al. 1964 |
| 119 | *Cryptopleura imbricata* E.Y.Dawson 1962 |  |  | + | - | + |  | Dawson et al. 1964 |
| 120 | *Cryptopleura peltata* (Montagne) M.J.Wynne 2001 | *Cryptopleura corallinarum* (Nott) N.L.Gardner |  | + | - | + |  | Dawson et al. 1964, Arakaki et al. 2018a |
| 121 | *Cryptopleura ramosa* (Hudson) L.Newton 1931 | *Acrosorium uncinatum* (Turner) Kylin |  | + | + | - |  | Acleto 1973 |
| 122 | *Cryptopleura taylorii* E.Y.Dawson, Acleto & Foldvik 1964* |  | Paita, Piura | - | + | - | This species is only known from the type locality. | Dawson et al. 1964 |
| 123 | *Delesseria leiphaemia* (Montagne) M.Howe 1914 |  |  | ND | ND | ND | This species has been collected once in Peru and its taxonomic status is uncertain (Ramírez and Santelices 1991, Wynne 2014). | Howe 1914, Ramírez and Santelices 1991, Wynne 2014 |
| 124 | *Hymenena durvillei* (Bory) Kylin 1924 |  |  | ND | ND | ND | This species has been collected once in Peru and its taxonomic status is uncertain (Ramírez and Santelices 1991). | Montagne 1842, Ramírez and Santelices |
| 125 | *Hymenena venosa* (Linnaeus) C.Krauss 1846 |  |  | - | - | + | According to Ramírez and Santelices (1991), this species has been reported as *Aglaophyllum striolatum* (Howe 1914, Dawson et al. 1964) and it must be reexamined and reinterpreted for Peru. | Kützing 1849, Howe 1914, Dawson et al. 1964, Ramírez and Santelices 1991 |
| 126 | *Hypoglossum* aff. *attenuatum* var. *abyssicola* (W.R.Taylor) E.Y.Dawson 1962 |  |  | - | - | + |  | Acosta et al. 2001 |
| 127 | *Nitophyllum bartlingianum* (Kützing) J.Agardh 1852 | *Schizoglossum*  *bartlingianum*  Kützing | From Peru but no specific site was indicated | ND | ND | ND | This report may correspond to a depauperate phase of *Cryptopleura cryptoneuron* (Dawson et al. 1964). | Kützing 1843, Dawson et al. 1964 |
| 128 | *Nitophyllum galapagense* W.R.Taylor 1945 |  |  | - | + | - |  | Acleto 1973 |
| 129 | *Nitophyllum peruvianum* (Montagne) M.Howe* | *Delesseria peruviana* Montagne, *Delesseria phylloloma* Montagne |  | - | - | + |  | Howe 1914, Acleto 1973 |
| 130 | *Phycodrys ovifolia* (Kützing) M.J.Wynne 1989 | *Phycodrys cerrateae* E.Y.Dawson, Acleto & Foldik 1964 | Barranco, Lima | - | - | + |  | Dawson et al. 1964 |
| 131 | *Phycodrys quercifolia* (Bory) Skottsberg 1922 |  |  | - | - | + |  | Montagne 1846, Acleto 1980 |
| 132 | *Phycodrys rubens* (Linnaeus) Batters 1902 | *Delesseria sinuosa* J.V.Lamouroux |  | - | - | + | One single report in Callao. According to Dawson et al. (1964), *D. sinuosa* (=*P. rubens*) may be conspecific with *Phycodrys cerrateae* (= *P. ovifolia*). | Montagne 1846, Howe 1914, Dawson et al. 1964 |
| 133 | **Dumontiaceae** | *Leptocladia peruviana* M.Howe 1914* |  | Bay of Sechura, Piura | - | + | + |  | Howe 1914 |
| 134 | **Erythrotrichiaceae** | *Erythrocladia endophloea* M.Howe 1914 |  | Bay of Sechura, Piura | - | - | + |  | Howe 1914 |
| 135 | *Erythrotrichia carnea* (Dillwyn) J.Agardh 1883 |  |  | + | - | + |  | Acleto 1980 |
| 136 | *Erythrotrichia polymorpha* M.Howe 1914 |  | Chincha Islands, Ica | - | - | + |  | Howe 1914, Araujo 1971 |
| 137 | **Galaxauraceae** | *Tricleocarpa fragilis* (Linnaeus) Huisman & R.A.Townsend 1993 | *Galaxaura oblongata* (J.Ellis & Solander) J.V.Lamouroux |  | + | - | - |  | Acleto 1973 |
| 138 | **Gelidiaceae** | *Gelidium chilense* (Montagne) Santelices & Montalva 1983 | *Acropeltis chilensis* Montagne |  | - | - | + |  | Acleto 1973 |
| 139 | *Gelidium congestum* W.R.Taylor 1947 |  | Salaverry, Trujillo, La Libertad | - | - | + | This species might be a morphological variant of *Gelidium lingulatum* (Santelices and Montalva 1983). | Taylor 1947, Santelices and Montalva 1983 |
| 140 | *Gelidium crinale* (Hare ex Turner) Gaillon 1828 |  |  | - | - | + |  | Arakaki et al. 2018a |
| 141 | *Gelidium crispum* M.Howe 1914 |  | Pescadores Island, Ancon, Lima | - | - | + | This species might be a morphological variant of *Gelidium lingulatum* (Santelices and Montalva 1983) | Howe 1914, Santelices and Montalva 1983 |
| 142 | *Gelidium howei* Acleto 1973* |  |  | + | + | + | Previously registered as *Gelidium filicinum* (Acleto 1973). | Acleto 1973 |
| 143 | *Gelidium lingulatum* Kützing 1868 |  |  | - | - | + |  | Rodríguez-Rodríguez et al. 2018 |
| 144 | *Gelidium mcnabbianum* (E.Y.Dawson) B.Santelices 1998 | *Pterocladia mcnabbiana* E.Y.Dawson |  | + | - | - |  | Dawson et al. 1964 |
| 145 | *Gelidium pusillum* (Stackhouse) Le Jolis 1863 |  |  | + | + | - |  | Piccone 1886, Dawson et al. 1964 |
| 146 | *Gelidium seminudum* J.Agardh 1841* |  | Lima | - | - | + | This species is only known from the original description. | Agardh 1841 |
| 147 | **Gigartinaceae** | *Chondracanthus chamissoi* (C.Agardh) Kützing 1843 | *Sphaerococcus*  *chamissoi*  C.Agardh, *Gigartina chamissoi* (C.Agardh) J.Agardh, *Gigartina lessoni*i (Bory) J.Agardh, *Chondracanthus glomeratus* (M.Howe) Guiry, *Chondracanthus chauvinii* (Bory) Kützing |  | - | + | + | Two morphological groups can be recognized in *C. chamissoi*: lessoni form and chauvinii form (Dawson et al. 1964). Although both have been treated as a separated species by some authors (Ramírez & Santelices 1991, Hughey and Hommersand 2008, Bulboa Contador et al. 2019), a recent study has confirmed that they correspond to the same species, based on molecular data (Rodríguez and Otaíza 2020). Also, Suarez et al. (2018) showed that *Chondracanthus glomeratus* is conspecific to *C. chamissoi* based on molecular analysis. | Montagne 1839, Howe 1914, Dawson et al. 1964, Ramírez and Santelices 1991, Hughey and Hommersand 2008,Suárez 2018, Bulboa-Contador et al. 2019, Rodríguez and Otaíza 2019 |
| 148 | *Chondrus canaliculatus* (C.Agardh) Greville 1830 |  |  | - | - | + |  | Howe 1914, Dawson et al. 1964 |
| 149 | *Gigartina paitensis* W.R.Taylor* |  | Paita, Piura | - | + | - |  | Taylor 1947 |
| 150 | *Iridaea tuberculosa* (J.D.Hooker & Harvey) Leister 1993 | *Gigartina tuberculosa* (J.D.Hooker & Harvey) Grunow |  | - | + | + |  | Howe 1914, Dawson et al. 1964 |
| 151 | *Mazzaella denticulata* (E.Y.Dawson, Acleto & Foldvik) Fredericq 1993 | *Rhodoglossum denticulatum* E.Y.Dawson, Acleto & Foldvik | Barranco, Lima | - | - | + |  | Dawson et al. 1964 |
| 152 | *Mazzaella hancockii (*E.Y.Dawson) Fredericq 1993 | *Rhodoglossum hancockii* E.Y.Dawson |  | - | - | + |  | Dawson et al. 1964 |
| 153 | *Mazzaella laminarioides* (Bory) Fredericq in Hommersand 1993 | *Iridaea laminarioides* Bory de Saint-Vincent |  | - | - | + | There is one single report of this species (Callao). | Montagne 1839, Howe 1914 |
| 154 | **Gracilariaceae** | *Agarophyton chilense* (C.J.Bird, McLachlan et E.C.Oliveira) Gurgel, J.N.Norris et Fredericq 2018 | *Gracilaria chilensis*C.J.Bird, McLachlan & E.C.Oliveira |  | - | - | + |  | Arakaki et al. 2015 |
| 155 | *Gracilaria corticata* (J.Agardh) J.Agardh 1852 |  |  | ND | ND | ND | There are no further records of this species since Grunow (1867). | Grunow 1867 |
| 156 | *Gracilaria crispata* Setchell & Gardner 1924 |  |  | + | - | - |  | Acleto 1973 |
| 157 | *Gracilaria peruana* Piccone & Grunow 1886 |  | Paita, Piura | - | + | - | According to Dawson et al. (1964), this species has been reported as *Gracilaria brevis* by Taylor (1947). | Piccone 1886, Taylor 1947, Dawson et al. 1964 |
| 158 | *Gracilaria tepocensis* (E.Y.Dawson) E.Y.Dawson 1961 |  |  | + | - | + |  | Acleto 1973, Arakaki et al. 2018b |
| 159 | *Gracilaria textorii* (Suringar) Hariot 1891 | *Gracilaria vivesii*  Howe |  | - | + | - |  | Acleto 1973 |
| 160 | *Gracilaria textorii* var. *cunninghamii* (Farlow) E.Y.Dawson 1961 | *Gracilaria*  *cunninghamii*  Farlow |  | - | + | - |  | Acleto 1973 |
| 161 | *Gracilaria tuberculosa* (Hampe ex Kützing) J.Agardh 1852 | *Sphaerococcus tuberculosus* Hampe ex Kützing | From Peru but no specific site was indicated | ND | ND | ND | This species might correspond to *Gracilaria chilensis* (=*Agarophyton chilense*) (Bird et al. 1986) or *Agardhiella tenera* (currently reported as *Sarcodiotheca gaudichaudii*) (Howe 1914). | Kützing 1849, Howe 1914, Bird et al. 1986 |
| 162 | *Gracilariopsis lemaneiformis* (Bory de Saint-Vincent) E.Y.Dawson, Acleto & Foldvik 1964 | *Gigartina lemaneiformis* Bory, *Gracilaria lemaneiformis* (Bory) Greville, *Cordylecladia lemanaeformis* (Bory) M.Howe | Paita, Piura | - | + | + | According to Dawson et al. (1964), this species was reported as *Gracilaria confervoides* by Collins (1995). | Bory 1826-1828, Collins 1915, Dawson et al. 1964, Arakaki et al. 2015 |
| 163 | **Halymeniaceae** | *Cryptonemia anconensis* Acleto & Zúñiga 2011* |  | Ancon, Lima | - | - | + | Acleto and Zúñiga (2011) included the holotype of *Chrysymenia*(?) *lobata* (=*Cryptonemia lobata*) as a synonym of this species, excluding the specimens from Chile studied as *C. lobata by* Santelices et al. (1989). Also, specimens of *Sebdenia limensis* studied by Dawson et al. (1964) correspond to *C. anconensis.* | Dawson et al. 1964, Santelices et al. 1989, Acleto and Zúñiga 2011 |
| 164 | *Cryptonemia angustata* (Setchell & N.L.Gardner) E.Y.Dawson 1954 |  |  | - | - | + | This species may be conspecific with *C. obovata* (Gabrielson et al. 2004). | Dawson et al. 1964, Gabrielson et al. 2004 |
| 165 | *Cryptonemia chinchensis* (W.R.Taylor) Acleto & Zúñiga 2011 | *Sebdenia chinchensis* W.R.Taylor, *Cryptonemia chiangii* Acleto | Chincha islands, Ica | - | - | + |  | Taylor 1947, Dawson et al. 1964, Acleto 1973 |
| 166 | *Cryptonemia heteronema* (M.Howe) Acleto & Zúñiga 2011 | *Sebdenia heteronema* M.Howe, *Sebdenia afuerensis* W.R.Taylor | Bay of Sechura, Piura | - | - | + |  | Howe 1914, Acleto and Zúñiga 2011 |
| 167 | *Cryptonemia latissima* J.Agardh 1876 |  |  | - | - | + |  | Acleto 1973 |
| 168 | *Cryptonemia limensis* (Kützing) J.A.Lewis | *Sebdenia limensis* (Kützing) M.Howe, *Cryptonemia peruviana* Acleto | Callao | - | - | + |  | Kützing 1849, Lewis 1991, Acleto and Zúñiga 2011 |
| 169 | *Cryptonemia obovata* J.Agardh 1876 |  |  | - | - | + |  | Acleto 1973 |
| 170 | *Grateloupia doryphora* (Montagne) M.Howe 1914 | *Halymenia doryphora*  Montagne | Callao | + | + | + | According to Dawson et al. (1964), and Ramírez and Santelices (1991), this species has been reported as *Grateloupia schizophylla* and *Iridaea violacea* by Howe (1914). However, molecular data have demonstrated that *G. schizophylla* and *G. doryphora* are not conspecific, and that *G. doryphora* may belong to *Mariaramirezia* genus (Calderon et al. 2014a). | Montagne 1839, Howe 1914, Dawson et al. 1964, Ramírez and Santelices 1991, Calderon et al. 2014a |
| 171 | *Grateloupia filicina* (J.V.Lamouroux) C.Agardh 1822 |  |  | + | - | - |  | Acleto 1973 |
| 172 | *Grateloupia rojasii* C.O.Acleto 1973* |  | La Puntilla, Pisco, Ica | - | - | + |  | Acleto 1973 |
| 173 | *Grateloupia schizophylla* Kützing 1867 |  |  | - | - | + | This species may belong to *Mariaramirezia* genus according to molecular data (Calderon et al. 2014). | Howe 1914, Calderon et al. 2014a |
| 174 | *Grateloupia spathulata* J.Agardh 1851 |  |  | ND | ND | ND | This species is only known from the original description, but the type material likely came from Chile (Hower 1914, Calderon 2014). | Howe 1914, Calderon et al. 2014a |
| 175 | *Halymenia cerratei* C.O.Acleto 1973* |  | Ancon, Lima | - | - | + |  | Acleto 1973 |
| 176 | *Halymenia foliacea* W.R.Taylor 1947* |  | Callao | - | - | + |  | Taylor 1947 |
| 177 | *Halymenia tenera* M.Howe 1914* |  | Bay of Sechura, Piura | - | + | + |  | Howe 1914 |
| 178 | *Mariaramirezia lapathifolia* (Kützing) M.S.Calderon, G.H.Boo & S.M.Boo 2016* | *Halymenia lapathifolia* Kützing, *Sebdenia lapathifolia* (Kützing) M.Howe, *Cryptonemia lapathifolia* (Kützing) Acleto & Zúñiga, *Ramírezia lapathifolia* (Kützing) M.S.Calderon, G.H.Boo & S.M.Boo 2014 | Lima | - | + | + |  | Kützing 1851-1869, Howe 1914, Acleto and Zúñiga 2011, Calderon et al. 2014a, 2016a |
| 179 | *Neorubra decipiens* (Montagne) M.S.Calderon, G.H.Boo & S.M.Boo 2014 | *Gelidium decipiens* Montagne, *Prionitis decipiens* (Montagne) J.Agardh, *Lobocolax deformans* M.Howe | Paita, Piura | - | - | + |  | Montagne 1846, Dawson et al. 1964, Calderon et al. 2014b |
| 180 | *Neorubra denticulata* (Montagne) M.S.Calderon, G.H.Boo & S.M.Boo 2014* | *Grateloupia denticulata* Montagne | Paita, Piura | - | + | - |  | Montagne 1842, Calderon et al. 2014b |
| 181 | *Pachymenia cuticulosa* M.Howe 1914 |  | Vieja Island, Bay of La Indepen-dencia, Pisco, Ica | - | - | + |  | Howe 1914 |
| 182 | *Phyllymenia acletoi* M.S.Calderon, G.H.Boo & S.M.Boo 2014* |  | Ancon, Lima | - | - | + | This species has probably been misidentified as *Grateloupia doryphora* in Peru (Calderon et al. 2014a). | Calderon et al. 2014a |
| 183 | *Phyllymenia papenfussii* Acleto 1973* |  | Barranco, Lima | - | - | + |  | Acleto 1973 |
| 184 | *Prionitis albemarlensis* W.R.Taylor 1945 |  |  | - | - | + |  | Dawson et al. 1964, Arakaki et al. 2018b |
| 185 | **Hapalidiaceae** | *Melobesia marginata* Setchell & Foslie 1902 |  |  | + | + | - |  | Taylor 1947, Dawson et al. 1964 |
| 186 | **Hildenbrandiaceae** | *Hildenbrandia rubra* (Sommerfelt) Meneghini 1841 | *Hildenbrandia prototypus* Nardo |  | + | - | - |  | Dawson et al. 1964 |
| 187 | **Kallymeniaceae** | *Callophyllis variegata* (Bory) Kützing 1843 |  |  | - | - | + |  | Kylin and Skottsberg 1919, Acleto 1973 |
| 188 | *Callophyllis violacea* J.Agardh |  |  | - | + | - |  | Acleto 1973 |
| 189 | *Metacallophyllis laciniata* (Hudson) A.Vergés & L.Le Gall 2017 | *Callophyllis*  *laciniata*  (Hudson) Kützing |  | - | - | + | The single record has probably been incorrectly attributed to Peru (Howe 1914). | Montagne 1839, Howe 1914 |
| 190 | *Salishia chilensis* (J.Agardh) Clarkston & G.W.Saunders 2012 | *Callophyllis*  *chilensis*  (J.Agardh) Okamura, *Pugetia chilensis* (J.Agardh) Kylin |  | - | - | + |  | Howe 1914, Acleto 1973 |
| 191 | **Lithophyllaceae** | *Amphiroa dimorpha* Me.Lemoine 1929 |  |  | + | - | - |  | Dawson et al. 1964 |
| 192 | *Amphiroa pacifica* Kützing 1858 |  | From Peru but no specific site was indicated | ND | ND | ND | There are no further records of this species since Kützing's description (Dawson et al. 1964). | Kützing 1851-1869, Dawson et al. 1964 |
| 193 | *Amphiroa peruana* Areschoug ex W.R.Taylor 1945 |  |  | - | - | + | This species was thought to be a single report in Peru; however, two additional reliable determinations from Chincha Sur Island and Pisco (Ica) have been added (Dawson et al. 1964, Wynne 2019). | Areschoug 1854-56, Dawson et al. 1964, Wynne 2019 |
| 194 | *Amphiroa setacea* Kützing 1840 |  | From Peru but no specific site was indicated | ND | ND | ND | There are no further records of this species since Kützing's description (Dawson et al. 1964). | Kützing 1849, Dawson et al. 1964 |
| 195 | *Lithophyllum imitans* Foslie 1909 |  |  | + | - | - |  | Dawson et al. 1964 |
| 196 | **Palmariaceae** | *Palmaria georgica* (Reinsch) R.W.Ricker 1987 | *Rhodymenia*  *palmatiformis*  Skottsberg |  | - | + | - | This report corresponds to a single record by Bory (1828). | Bory 1826-1828 |
| 197 | **Phyllophoraceae** | *Acletoa tarazonae* M.S.Calderon & S.M.Boo 2017 |  | Barranco, Lima | - | - | + |  | Calderon and Boo 2017 |
| 198 | *Ahnfeltiopsis flabelliformis* (Harvey) Masuda 1993 | *Gymnogongrus flabelliformis* Harvey |  | - | - | + |  | Acleto 1973 |
| 199 | *Ahnfeltiopsis pygmaea* (J.Agardh) P.C.Silva & DeCew 1992 | *Gymnogongrus pygmaeus* J.Agardh |  | ND | ND | ND |  | Acleto 1980 |
| 200 | *Asterfilopsis centralis* M.S.Calderon & S.M.Boo 2016 |  | Pisco, Ica | - | - | + | This species has probably been misidentified earlier as *Asterfilopsis furcellata* (Calderon and Boo 2016b). | Calderon and Boo 2016b |
| 201 | *Asterfilopsis disciplinalis* (Bory) M.S.Calderon & S.M.Boo 2016 | *Gymnogongrus disciplinalis* (Bory) J.Agardh |  | + | - | + | *Actinococcus mollis*, reported by Howe (1914), may represent the nemathecium of *Asterfilopsis disciplinalis* (McCandless and Vollmer 1983), although there is no further information about its taxonomic status. | Howe 1914, Acleto 1973, McCandless and Vollmer 1983, Calderon and Boo 2016b |
| 202 | *Asterfilopsis furcellata* (C.Agardh) M.S.Calderon & S.M.Boo 2016 | *Sphaerococcus furcellatus*  C.Agardh, *Gymnogongrus furcellatus* (C.Agardh) J.Agardh | Huanchaco, Trujillo, La Libertad | - | + | + |  | Agardh 1822, Calderon and Boo 2016b |
| 203 | *Asterfilopsis piurana* M.S.Calderon & S,M.Boo 2016* |  | Yacila, Piura | - | + | - | This species has probably been misidentified earlier as *Asterfilopsis furcellata* (Calderon and Boo 2016b). | Calderon and Boo 2016b |
| 204 | *Besa divaricata* (Holmes) M.S.Calderon & S.M.Boo 2016 | *Gymnogongrus divaricatus* Holmes |  | - | - | + |  | Acleto 1973, Calderon et al. 2016b |
| 205 | *Gymnogongrus caespitosus* M.S.Calderon & S.M.Boo 2017* |  | Yacila, Piura | - | + | - |  | Calderon and Boo 2017 |
| 206 | *Gymnogongrus durvillei* (Bory) M.S.Calderon & S.M.Boo 2017 | *Ahnfeltia concinna* J.Agardh, *Ahnfeltia durvillei* (Bory) J.Agardh |  | + | + | + |  | Howe 1914, Acleto 1973, Calderon and Boo 2017 |
| 207 | *Petroglossum pacificum* Hollenberg 1943 |  |  | ND | ND | ND |  | Acosta and Figueroa 1990 |
| 208 | *Phyllophorella humboldtiana* M.S.Calderon & S.M.Boo 2016 |  | La Punta, Callao | - | - | + |  | Calderon and Boo 2016a |
| 209 | *Phyllophorella limaensis* M.S.Calderon & S.M.Boo 2016 |  | Barranco, Lima | - | - | + |  | Calderon and Boo 2016a |
| 210 | *Phyllophorella peruviana* (E.Y.Dawson, Acleto & Foldvik) Calderon & Boo 2016 | *Phyllophora peruvian* E.Y.Dawson, Acleto & Foldvik | Barranco, Lima | - | - | + | This species has been incorrectly synonymized to *Stenogramma interruptum* (Ramírez and Santelices 1991). According to molecular data, *S. interruptum* is not conspecific with *P. peruviana* (Calderon and Boo 2016a). | Dawson et al. 1964, Calderon and Boo 2016a |
| 211 | *Stenogramma interruptum* (C.Agardh) Montagne 1846 |  |  | - | - | + |  | Arakaki et al. 2018b |
| 212 | **Plocamiaceae** | *Plocamium cartilagineum* (Linnaeus) P.S.Dixon 1967 | *Plocamium coccineum* f. *compactum* Collins |  | - | - | + | There are no further records of this species since Collins' report (Dawson et al. 1964, Ramírez and Santelices 1991). Many of the species called *P. cartilagineum* in the Pacific and Australasia represent different entities, some of which may be undescribed (Saunders and Lehmkuhl 2005). | Collins 1915, Dawson et al. 1964, Ramírez and Santelices 1991, Saunders & Lehmkuhl 2005 |
| 213 | **Pterocladiaceae** | *Pterocladiella caloglossoide*s (M.Howe) Santelices | *Gelidium caloglossoides* M.Howe, *Pterocladia caloglossoides* (M.Howe) E.Y.Dawson | San Lorenzo Island, Callao | - | - | + |  | Howe 1914 |
| 214 | *Pterocladiella capillacea* (S.G.Gmelin) Santelices & Hommersand 1997 | *Pterocladia pyramidalis* (N.L.Gardner) E.Y.Dawson |  | + | - | - |  | Acleto 1973 |
| 215 | *Pterocladiella luxurians* (Collins) Boo & Miller 2016 | *Gelidium crinale*  var. *luxurians* (Collins) Collins ex N.L.Gardne |  | - | - | + |  | Piccone 1886, Dawson et al. 1964 |
| 216 | **Rhodomelaceae** | *Bostrychia calliptera* (Montagne) Montagne 1842 | *Bostrychia pinnata* J.Tanaka & Chihara |  | + | - | - |  | West 1991 |
| 217 | *Bostrychia radicans* (Montagne) Montagne 1842 |  |  | + | - | - | According to Dawson et al. (1964), this species has been reported as *Bostrychia leprieurii*by Howe (1914). | Howe 1914, Dawson et al. 1964 |
| 218 | *Bryocladia thyrsigera* (J.Agardh) F.Schmitz 1901 | *Polysiphonia*  *thyrsigera*  J.Agardh |  | - | - | + | One single report in Callao (Agardh 1863). | Agardh 1851-1863, Ramírez and Santelices 1991 |
| 219 | *Chondria secundata* (J.Agardh) De Toni 1903 |  |  | - | - | + | This report corresponds to a single record in southern Peru (Agardh 1851, Howe 1914). | Agardh 1851-1863, Howe 1914 |
| 220 | *Eutrichosiphonia confusa* (Hollenberg) A.M.Savoie & G.W.Saunders 2019 | *Polysiphonia confusa* Hollenberg |  | - | - | + |  | Dawson et al. 1964 |
| 221 | *Laurencia gardneri* Hollenberg 1943 |  |  | - | + | - |  | Acosta et al. 2001 |
| 222 | *Laurencia paitensis* W.R.Taylor 1947* |  | Paita, Piura | - | + | - |  | Taylor 1947 |
| 223 | *Melanothamnus peruviensis* (D.E.Bustamante, B.Y.Won, M.E.Ramírez & T.O.Cho) Díaz-Tapia & Maggs 2017 | *Neosiphonia peruviensis* D.E.Bustamante, B.Y.Won, M.E.Ramírez & T.O.Cho | Lagunillas, Pisco, Ica | - | - | + |  | Bustamante et al. 2012b |
| 224 | *Melanothamnus ramireziae* (D.E.Bustamante, B.Y. Won & T.O.Cho) Díaz-Tapia & Maggs 2017 | *Neosiphonia ramirezii* D.E.Bustamante, B.Y.Won & T.O.Cho | Lagunillas, Pisco, Ica | - | - | + |  | Bustamante et al. 2012a |
| 225 | *Melanothamnus sphaerocarpus* (Børgesen) Díaz-Tapia & Maggs 2017 | *Polysiphonia sphaerocarpa* Børgesen |  | - | - | + |  | Dawson et al. 1964 |
| 226 | *Osmundea pinnatifida* (Hudson) Stackhouse 1809 | *Laurencia pinnatifida* (Hudson) J.V.Lamouroux |  | ND | ND | ND | There are no further records of this species since Montagne's report (Ramírez and Santelices 1991). | Montagne 1846, Ramírez and Santelices 1991 |
| 227 | *Placophora binderi* (J.Agardh) J.Agardh 1863 | *Rhodopeltis geyleri* Askenasy |  | ND | ND | ND | There are no further records of this species since Askenasy's report (Howe 1914, Dawson et al. 1964). | Askenasy 1872, Howe 1914, Dawson et al. 1964 |
| 228 | *Polysiphonia abscissa* J.D.Hooker & Harvey 1845 | *Polysiphonia microcarpa* J.D.Hooker & Harvey |  | - | - | + |  | Howe 1914, Acosta 1977 |
| 229 | *Polysiphonia paniculata* Montagne 1842 |  | From Peru but no specific site was indicated | - | + | + |  | Montagne 1842, Howe 1914, Dawson et al. 1964 |
| 230 | *Polysiphonia sertularioides* (Grateloup) J.Agardh 1863 | *Polysiphonia flaccidissima* Hollenberg |  | + | - | + |  | Dawson et al. 1964 |
| 231 | *Polysiphonia subtilissima*Montagne 1840 |  |  | - | - | + |  | Dawson et al. 1964 |
| 232 | *Streblocladia camptoclada* (Montagne) Falkenberg 1901 |  | Callao | - | + | + |  | Montagne 1837 |
| 233 | *Streblocladia spicata* M.Howe 1914* |  | Pisco, Ica | - | - | + |  | Howe 1914 |
| 234 | *Symphyocladiella bartlingiana* (Kützing) D.Bustamante, B.Y.Won & T.O.Cho 2019 | *Polysiphonia bartlingiana* Kützing | From Peru but no specific site was indicated | - | - | + |  | Kützing 1843, Bustamante et al. 2019b |
| 235 | *Symphyocladiella dendroidea* (Montagne) D.Bustamante, B.Y.Won, S.C.Lindstrom & T.O.Cho 2019 | *Polysiphonia dendroidea* Montagne, *Pterosiphonia dendroidea* (Montagne) Falkenberg | Callao | + | + | + |  | Montagne 1837, Dawson et al. 1964, Bustamante et al. 2019b |
| 236 | *Symphyocladiella spinifera* (Kützing) D.Bustamante, B.Y.Won, S.C.Lindstrom & T.O.Cho 2019 | *Pterosiphonia*  *spinifera* (Kützing) Ardré |  | - | - | + | This species has been misidentified as *Pterosiphonia pennata* (=*Xiphosiphonia pennata*) (Bustamante et al. 2016). | Bustamante et al. 2016, 2019b |
| 237 | **Rhodymeniaceae** | *Botryocladia pseudodichotoma* (Farlow) Kylin 1931 |  |  | - | - | + |  | Acleto 1980 |
| 238 | *Rhodymenia californica* Kylin 1931 |  |  | - | - | + |  | Dawson et al. 1964 |
| 239 | *Rhodymenia corallina* (Bory) Greville 1830 | *Sphaerococcus corallina* Bory |  | - | + | + |  | Bory 1826-1828, Howe 1914, Dawson et al. 1964 |
| 240 | *Rhodymenia flabellifoli*a (Bory) Montagne 1846 |  |  | + | + | + |  | Piccone 1886, Howe 1914, Dawson et al. 1964 |
| 241 | *Rhodymenia howeana* E.Y.Dawson 1941 |  | La Punta, Callao (sterile and tetrasporic type); Lobos de Tierra Island, Lambaye-que (cysto-carpic type) | - | - | + |  | Dawson 1941, Dawson et al. 1964 |
| 242 | *Rhodymenia multidigitata* E.Y.Dawson, Acleto & Foldvik 1964* |  | La Punta, Callao | - | - | + |  | Dawson et al. 1964 |
| 243 | *Rhodymenia peruviana* J.Agardh 1851 |  | Southern coast of Peru | - | - | + | This species possibly does not occur within the present limits of Peru (Howe 1914). | Agardh 1851-1863, Howe 1914 |
| 244 | *Rhodymenia skottsbergii* E.Y.Dawson 1941 |  |  | - | - | + |  | Acleto 1980 |
| 245 | **Sarcodiaceae** | *Trematocarpus dichotomus* Kützing 1843 |  | From Peru but no specific site was indicated | - | - | + |  | Kützing 1843, Howe 1914, Dawson et al. 1964 |
| 246 | **Schimmelmanniaceae** | *Schimmelmannia dawsonii* Acleto 1972 |  | Bay of San Nicolas, Nazca, Ica | - | - | + | According to Ramírez and Santelices (1991), this species does not present clear differences with *Schimmelmannia* *plumosa* reported for central Chile. | Acleto 1972, Ramírez and Santelices 1991 |
| 247 | **Schizymeniaceae** | *Schizymenia binderi* (J.Agardh ex Kützing) J.Agardh 1851 |  |  | - | - | + |  | Dawson et al. 1964 |
| 248 | **Scinaiaceae** | *Nothogenia fastigiata* (Bory) P.G.Parkinson | *Chaetangium fastigiatum* (Bory) J.Agardh |  | - | - | + | According to Ramírez and Santelices (1991), this species was reported as *Fucodium fastigiatum* (=*Silvetia compressa*) by Piccone (1886). | Piccone 1886, Acleto 1973, Ramírez and Santelices 1991 |
| 249 | *Scinaia confusa* (Setchell) Huisman 1985 | *Pseudogloiophloea confusa*  (Setchell) Levring |  | - | - | + |  | Acleto 1973 |
| 250 | *Scinaia johnstoniae* Setchell 1914 |  |  | - | + | - |  | Acleto 1973 |
| 251 | *Scinaia latifrons* M.Howe 1911 |  |  | + | - | - |  | Acleto 1973 |
| 252 | *Scinaia undulata* (Montagne) Huisman 1985 | *Pseudogloiophloea undulata* (Montagne) Acleto |  | - | - | + |  | Acleto 1973 |
| 253 | **Sebdeniaceae** | *Sebdenia flabellata* (J.Agardh) P.G.Parkinson 1980 |  |  | - | - | + | This species was originally registered as *Sebdenia polydactyla* (Acleto and Zúñiga 2011). Schneider and Wynne (1991) consider *S. polydactila* a synonym of *S. flabellata*. | Acleto 1980, Schneider and Wynne 1991, Acleto and Zúñiga 2011 |
| 254 | **Solieriaceae** | *Sarcodiotheca gaudichaudii* (Montagne) P.W.Gabrielson 1982 | *Gigartina gaudichaudii* Montagne | Paita, Piura | - | + | + | Specimens under the name of *Agardhiella tenera* are now referred to *S. gaudichaudii* (Ramírez & Santelices 1991). For a detailed explanation see Gabrielson (1982). | Montagne 1842, Howe 1914, Gabrielson 1982, Ramírez and Santelices 1991 |
| 255 | **Stylonemataceae** | *Stylonema alsidii* (Zanardini) K.M.Drew 1956 | *Goniotrichum alsidii* (Zanardini) M.Howe, *Goniotrichum elegans* (Chauvin) Zanardini |  | - | - | + |  | Howe 1914 |
| 256 | *Stylonema cornu-cervi* Reinsch 1875 | *Goniotrichum cornu-cervi* (Reinsch) Hauck |  | - | - | + |  | Howe 1914 |
| 257 | **Wrangeliaceae** | *Griffithsia chilensis* Montagne ex Kützing 1849 |  |  | - | - | + |  | Howe 1914 |
| 258 | *Griffithsia pacifica* Kylin 1925 |  |  | + | + | + |  | Dawson et al. 1964 |
| 259 | *Pleonosporium venustissimum* (Montagne) De Toni 1903 | *Callithamnion venustissimum*  Montagne | Callao | - | + | + |  | Montagne 1861, Howe 1914 |
| 260 | *Tiffaniella snyderae* (Farlow) I.A.Abbott 1971 |  |  | - | - | + |  | Araujo 1971 |

*Endemic species; ND, No data.

| **Supplementary table S4:** Seaweed species from Peru with generic record only. | | | | | |
| --- | --- | --- | --- | --- | --- |
|  |  | |  |  |  |
| **Phylum/Class** | **Family** | | **Taxon recorded** | **Remarks** | **Reference** |
| **Chlorophyta** | **Cladophoraceae** | | *Chaetomorpha* Kützing |  | Arakaki et al. 2018a |
|  |  |  | *Cladophora* Kützing |  | Arakaki et al. 2018a |
| **Codiaceae** | | *Codium* Stackhouse |  | Arakaki et al. 2018a |
| **Phaeophyceae** | **Dictyotaceae** | | *Dictyota* J.V.Lamouroux |  | Carbajal et al. 2019 |
| *Padina* Adanson | This unidentified *Padina* was found in Mancora (Piura) and it can be distinguished from *P. durvillei* based on its size, texture, coloration and number of cell layers | Acleto 1973 |
| **Ectocarpaceae** | | *Ectocarpus* Lyngbye |  | Carbajal et al. 2019 |
| **Scytosiphonaceae** | | *Endarachne* J.Agardh | The validity of this genus is questioned because its type species, *E. binghamiae*, is now a synonym of *Petalonia binghamiae*. This record from Marcona (Nasca) might correspond to *P. binghamiae*, which is reported for central and north Chile (Ramírez, and Santelices, 1991). | Ramírez and Santelices 1991, Roque-Sánchez et al. 2017 |
|  | |  |
| **Rhodophyta** | **Bangiaceae** | | *Porphyra* C.Agardh | This unidentified species, from Marcona (Ica), has also been reported from Antofagasta to Biobío region, in Chile | Arakaki et al. (2018b), Márquez-Corigliano et al. (2019) |
| *Pyropia* J.Agardh | This unidentified species, from Marcona (Ica), has also been reported in north Chile | Arakaki et al. (2018b), Márquez-Corigliano et al. (2019) |
| **Delesseriaceae** | | *Acrosorium* Zanardini ex Kützing | Unidentified specimens were found in Ica and Lima. | Taylor (1947) |
| **Gelidiaceae** | | *Gelidium* J.V.Lamouroux | Two unidentified species were found in Talara (Piura) and Puerto Chicama (La Libertad) | Acleto (1973) |
| **Halymeniaceae** | | *Phyllymenia* J.Agardh |  | Arakaki et al. (2018b) |
| **Rhodomelaceae** | | *Polysiphonia* Greville | Unidentified specimens were found in Chincha islands (Ica) (Collins 1915), and Lobos de Afuera island (Lambayeque) associated with *Caulerpa filiformis* and *Polysiphonia paniculata* (Howe 1914) | Howe (1914), Collins (1915) |
| **Rhodymeniaceae** | | *Rhodymenia* Greville |  | Arakaki et al. (2018b) |
| **Scinaiaceae** | | *Nothogenia* Montagne |  | Arakaki et al. (2018b) |

| **Supplementary Table S5:** Seaweed species incorrectly listed for Peru in AlgaeBase (Guiry and Guiry 2019, 2020). | | | | |
| --- | --- | --- | --- | --- |
|  |  |  |  |  |
| **Phylum/Class** | **Family** | **Currently Accepted Name** | **Remarks** | **Reference** |
| **Phaeophyceae** | **Adenocystaceae** | *Utriculidium durvillei* Skottsberg 1907 | This report by Acleto (1973) might correspond to *Asperococcus durvillaei* (=*Dactylosiphon durvillei*) as *U. durvillei* is only restricted to the subantartic and antartic regions (Wynne 1999). | Acleto 1973, Wynne 1999 |
| **Laminariaceae** | *Saccharina latissima* (Linnaeus) C.E.Lane, C.Mayes, Druehl & G.W.Saunders 2006 | The name *Ulva lactuca* var. *latissima* has been missapplied to representatives of this genus with very broad and sheet-like fronds*,* whereas the type corresponds to *Saccharina latissima*. Species under this name are now referred as *Ulva papenfussi* (Pham-Hoàng, H. 1969, Acleto 1973). | Pham-Hoàng 1969, Acleto 1973 |
| **Rhodophyta** | **Bangiaceae** | *Pyropia leucosticta* (Thuret) Neefus & J.Brodie 2011 | This species has been incorrectly reported for Peru. Specimes under this name are now referred as *P. thuretii* (Acleto and Endo 1977). | Acleto and Endo 1977 |
| **Ceramiaceae** | *Antithamnionella elegans (Berthold)* J.H.Price & D.M.John 1986 | This species has been only reported for Chile (Ramírez and Santelices 1991). | Ramírez and Santelices 1991 |
| **Gelidiaceae** | *Gelidium filicinum*Bory 1828 | The reports of this species in Peru correspond to *G. howei* (Acleto 1973). | Acleto 1973 |
| *Gelidium rex* Santelices & I.A.Abbott 1985 | This species has been only reported for Chile; however, it might be present in southern coast of Peru (Santelices and Abbott 1985; Ramírez and Santelices 1991). | Santelices and Abbott 1985, Ramírez and Santelices 1991 |
| **Gigartinaceae** | *Chondracanthus canaliculatus* (Harvey) Guiry 1993 | This species is distributed in the northwest coast of North America, from Oregon (USA) to Magdalena Island in Baja California Sur (Mexico) (Ballesteros-Grijalva et al. 1996). | Ballesteros-Grijalva et al. 1996 |
| **Halymeniaceae** | *Cryptonemia lobata* (Howe) M.E.Ramírez 1989 | The holotype of this species corresponds to *C. anconensis* (Acleto and Zúñiga 2011). | Acleto and Zúñiga 2011 |
| **Lithothamniaceae** | *Lithothamnion fuegianum* (Foslie) Foslie 1906 | This species has been only reported for Chile (Ramírez and Santelices 1991). | Ramírez and Santelices 1991 |
| **Rhodomelaceae** | *Dipterosiphonia dendritica* (C.Agardh) F.Schmitz 1897 | The distribution of this species in the Pacific Ocean is restricted to Australia, New Zealand and Easter Island (Rojas-Gonzales and Afonso-Carrillo 2004) | Rojas-Gonzales and Afonso-Carrillo 2004 |
| *Laurencia glomerata* (Kützing) Kützing 1849 | This species has been mistakenly atributted to Callao. The samples originally came from "Puerto Caballo" in the Atlantic Caribbean (Ramírez and Santelices 1991, Acosta et al. 2001). | Ramírez and Santelices 1991, Acosta et al. 2001 |
| *Xiphosiphonia pennata* (C.Agardh) Savoie & G.W.Saunders 2016 | This species from Peru seems to be misidentifications based on *Pterosiphonia spinifera* (=*Symphyocladiella spinifera*) from the Peruvian coast (Bustamante et al. 2016). | Bustamante et al. 2016 |
| **Scinaiaceae** | *Nothogenia fragilis* Montagne 1852 | This species has been only reported for Chile; however, it might be present in Peru (Lindstrom et al. 2015). | Lindstrom et al. 2015 |
| **Solieriaceae** | *Agardhiella subulata* (C.Agardh) Kraft & M.J.Wynne 1979 | Specimens under *A. tenera* in Peru must be referred to *S. gaudichaudii* instead of *A. subulata* (Gabrielson 1982), a taxon that occurs in western Atlantic Ocean, Caribbean Sea and Gulf of Mexico. *Neoagardhiella baileyi* (=*A. subulata*), reported by Acosta (1977), is a misapplied name for *S. gaudichaudii* (Gabrielson 1982). | Acosta 1977, Gabrielson 1982 |

| **Supplementary table S6:** Seaweed species reported for Peru with No Matching Record in AlgaeBase (Guiry and Guiry 2019, 2020). | | | | |
| --- | --- | --- | --- | --- |
|  | | | | |
| **Phylum/Class** | **Family** | **Taxon recorded** | **Remarks** | **Reference** |
| **Rhodophyta** | **Corallinaceae** | *Archeolithothamniun chilense* Foslie | Not listed in INA Database. Reported in Lobos de Afuera Island (Lambayeque) by Lemoine (1920). | Lemoine 1920, Ramírez and Santelices 1991 |
| **Halymeniaceae** | *Grateloupia cutleriae* f. *procera* Howe | Listed in INA Database. This species, reported by Howe (1914) in La Punta (Callao), is similar to *Phyllymenia acletoi* but it can be distinguished from this one based on blade shape and internal structures. *G. cutleriae* f. *procera* is a sparsely collected and poorly known species (Calderon et al. 2014a). | Howe 1914, Calderon et al. 2014a |

**Supplementary References**

Abbott, I.A. and G.J Hollenberg. (1976). *Marine algae of California*. Stanford University Press, Stanford, California. pp. 827.

Acleto, C. 1973. Las algas marinas del Perú. *Bol. Soc. Per. Bot.* 6: 1–164.

Acleto, C. 1980. Notas sobre las algas marinas del Perú I. Nuevos registros. *Publ. Mus. Hist. Nat. "Javier Prado". Ser. Bot.* 30: 1–33.

Acleto, C. 1984. Las especies peruanas de *Porphyra* (Rhodophyta, Bangiales), ll. *Porphyra crispata* Kjellman, un nuevo registro para nuestra flora. *Publ. Mus. Hist. Nat. "Javier Prado". Ser. Bot.* 31: 1–8.

Acleto, C. and J. Endo. 1977. Las especies peruanas de *Porphyra* (Rhodophyta, Bangiales),l. Taxonomía y distribución geográfica. *Publ. Mus. Hist. Nat. "Javier Prado". Ser. Bot.* 29: 1–19.

Acleto, C. and R. Zúñiga. 2011. Revisión de las especies peruanas de *Sebdenia* (Sebdeniales, Rhodophyta) y descripción de *Cryptonemia anconensis* sp. nov. (Halymeniales, Rhodophyta). *Rev. Peru. Biol.* 18: 97–112.

Acosta, J. 1977. Las Algas Marinas de la Provincia de Pisco, Departamento de Ica, Perú. *Publ. Mus. Hist. Nat. “Javier Prado”, Ser. Bot.* 28: 1–34.

Acosta, P .J., M. Figueroa and F. Betalleluz. 1998. *Gastroclonium pacificum* (Dawson) C.F. Chang et B.M. Xia (Rhodophyta, Rhodymeniales), nuevo registro de alga marina para el Perú. *Wiñay Yachay* 2: 27–132.

Acosta, P .J., M. Figueroa, E. Revilla and F. Betalleluz. 2001. Nuevos registros de algas marinas para el Perú. *Wiñay Yachay* 5: 117–128.

Acosta, P .J. and V .M. Figueroa. 1990. *Petroglossum pacificum* Hollenberg y *Stenogramma interrupta* (J. Ag.) Mont. (Rhodophyta, Phyllophoraceae), nuevos registros de algas marinas para el Perú. *Anales del II Congreso Latinoamericano de Ficología Marina, Universidad Nacional Federico Villarreal* 2: 24–33.

Agardh, C.A. 1821. *Icones algarum ineditae fasciculus secundus*. Eckstein, Stockholm. pp. [i-iv].

Agardh, C.A. 1822. Algae. *In:* (C.S. Kunth, ed.) *Synopsis plantarum, quas, in itinere ad plagam aequinoctialem orbis novi, collegerunt Al. de Humboldt et Am. Bonpland*. Volume Primus, Paris. pp. 1–6.

Agardh, J.G. 1841. In historiam algarum symbolae. *Linnaea* 15: 1–50, 443–457.

Agardh, J.G. 1851-1863. *Species genera et ordines algarum. Vol. 2. Algas florideas compiectens*. Lund. pp. 1291 (1851 = part. 1, pp. i-xii + 1-351; 1852 = part. 2, pp. 337 (bis) - 351 (bis), 352-720; part. 3, pp. 701 (bis) - 720 (bis), 721-786; 1863 = part. 3, pp. 787-1291 (1139-1158 omitted).

Alejo, I.A., T.E. Aleman, K. Almanza, W. Alonso, M.G. Altamirano-Manriquez, T. Armbrister, Y. Astudillo, L. Batistiana, J.S. Blas-Guido, D.E. Bustamante, M.S. Calderon, J.D. Camacho-Gonzalez, S. Cardoso, J. Castro, M.N. Chombo-Garcia, L.P. Colin, K.G. Cortina, A. Delgado, D. Espinoza-Castro, I. Estrada, E. Felix, S. Felix, M. Flores, S. Frausto, E.D. Garcia, M. Garcia, G. Gasca, D. Gomez, C. Gonzalez-Balcazar, B. G. Miramontes, V. Gonzalez, C.D. Guzman, E.C. Guzman, T.B. Hanneman, J. Hernandez, J.R. Hughey, V.N. Hutchins, E.R. Kallison, S. Lepe, S.M. Lopez, F. Zhai-Lorenzo, E. Macias-Reyes, F. Madrigal, N.G. Madrigal-Gonzalez, R. Mandujano, R. Manzo, P.L. Martinez, S. Martinez, B.A. Medina, M. Mendez, J.J. Mendoza-Contreras, A.I. Meza, K. Miller, A. Morales, E. Munoz, J.M. Myers, P-A. Patel, D. Pina Montes, A.N. Ponce, A.E. Ramirez, E. Rico, A. Rodriguez, J. Rodriguez, A. Ruiz, A. Saldana, R.A. Sanchez, J.D. Santana, F.D. Solano, A. Soto-Trujillo, S.J. Soto, A. Steinhardt, M. Talavera, M.M. Tapia, O. Tapia, M.O. Taveras-Dina, B.J. Torresillas, C. Vazquez-Ramos, F.L. Wong and Hartnell College Genomics Group (2019) The complete mitochondrial and plastid genomes of *Corallina chilensis* (Corallinaceae, Rhodophyta) from Tomales Bay, California, USA, *Mitochondrial DNA B* 4: 1879–1880.

Alvítez, E. and E. Rodríguez. 2005. Diversidad, taxonomía y ecología de las Phaeophyceae del litoral peruano. *Rebiol* 25: 15–30.

Arakaki, N., W. Schmidt, P. Carbajal and S. Frederiq. 2015. First occurrence of *Gracilaria chilensis,* and distribution of *Gracilariopsis lemaneiformis* (Gracilariaceae, Gracilariales) in Peru on the basis of *rbc*L sequence analysis. *Phytotaxa* 208:175–181.

Arakaki, N., P. Carbajal, A. Gamarra, P. Gil-Kodaka and M.E. Ramírez. 2018a. *Macroalgas de Pucusana. Guía de campo.* UNALM, Lima, Perú. pp. 56.

Arakaki, N., P. Gil-Kodaka, P. Carbajal, A. Gamarra and M.E. Ramírez. 2018b .I- Rhodophyta. *In: Macroalgas de la Costa Central del Perú.* UNALM, Lima, Perú. pp. 126.

Araujo, E. 1971. Algas marinas epifitas de la provincia de Trujillo. *Boletín de la Sociedad Botánica de La Libertad* 3: 37–60.

Areschoug, J.E. 1854-56. *Phyceae Extra-europeae exsiccatae. Fasc. I-III*. Uppsala, Sweden. pp. 90.

Askenasy, E. 1872. *Botanische morphologie studien 42*, figs. 61-68.

Ballesteros-Grijalva, G., J. Zertuche-González and M. Garcia-Lepe. 1996. Seasonal biomass variation of *Chondracanthus canaliculatus* (Rhodophyta, Gigartinales) associated with environmental factors, using a principal components analysis. *Cienc. Mar.* 22: 459–467.

Barton, E.S. 1901. *The genus Halimeda*. Siboga-Expeditie Monographe LX, Leiden. pp. 32.

Bird, C.J., J. McLachlan and E.C. de Oliveira. 1986. *Gracilaria chilensis* sp. nov. (Rhodophyta, Gigartinales) from Pacific South America. *Can. J. Bot.* 64: 2928–2934.

Brodie, J., L. Irvine, C.D. Neefus and S. Russell. 2008. *Ulva umbilicalis* Linnaeus and *Porphyra umbilicalis* Kützing (Rhodophyta, Bangiaceae): a molecular and morphological redescription of the species, with a typification update. *Taxon* 57: 1328-1331.

Bory de Saint Vincent, J.B. 1826-1828. Cryptogamie. *In:* (L.I. Duperrey, ed.) *Voyage autour du monde sur "La Coquille", pendant 1822, 1823, 1824 et 1825*. Botanique, Paris. pp. 301.

Bulboa-Contador, C., I.P. Massad, L. Contreras-Porcia, J. Zapata, F. Castañeda, M.E. Ramírez and P. Gil-Kodaka. 2019. Concise review of genus *Chondracanthus* (Rhodophyta: Gigartinales). J. Appl. Phycol. https://doi.org/10.1007/s10811-019-01956-w

Bustamante, D.E., B.Y. Won and T.O Cho. 2012a. *Neosiphonia ramirezii* sp. nov. (Rhodomelaceae, Rhodophyta) from Peru. *Algae. An International Journal of Algal Research* 27: 79–82.

Bustamante, D.E., B.Y. Won, M.E., Ramírez and T.O Cho. 2012b. *Neosiphonia peruviensis* sp. nov. (Rhodomelacea, Rhodophyta) from the Pacific coast of South America. *Bot. Mar.* 55: 359–366.

Bustamante, D.E., B.Y. Won and T.O. Cho. 2016. The conspecificity of *Pterosiphonia spinifera* and *P.* *arenosa* (Rhodomelaceae, Ceramiales) inferred from morphological and molecular analyses. *Algae. An International Journal of Algal Research* 31: 105–115.

Bustamante, D.E., M.S. Calderon, M.S. and J.R. Hughey. 2019a. Conspecificity of the Peruvian *Corallina ferreyrae* with *C. caespitosa* (Corallinaceae, Rhodophyta) inferred from genomic analysis of the type specimen. *Mitochondrial DNA B* 4: 1285–1286.

Bustamante, D.E., B.Y. Won, S.C. Lindstrom and T.O. Cho. 2019b. The new genus *Symphyocladiella* gen. nov. (Ceramiales, Rhodophyta) based on *S. bartlingiana* comb. nov. from the Pacific Ocean. *Phycologia* 58: 9–17.

Calderon, M.S., G.H. Boo and S.M. Boo. 2014a. Morphology and phylogeny of *Ramirezia osornoensis* gen. & sp. nov. and *Phyllymenia acletoi* sp. nov. (Halymeniales, Rhodophyta) from South America. *Phycologia* 53(1): 23-36.

Calderon, M.S., G.H. Boo and S.M. Boo. 2014b. *Neorubra decipiens* gen. & comb. nov. and *Phyllymenia lancifolia* comb. nov. (Halymeniales, Rhodophyta) from South America. *Phycologia* 53: 409–422.

Calderon, M.S. and S.M. Boo. 2016a. A new genus *Phyllophorella* gen. nov. (Phyllophoraceae, Rhodophyta) from central Peru, including *Phyllophorella peruviana* comb. nov. *Phyllophorella humboldtiana* sp. nov., and *Phyllophorella limaensis* sp. nov. *Bot. Mar.* 59: 339–352.

Calderon, M.S. and S.M. Boo. 2016b. Phylogeny of Phyllophoraceae (Rhodophyta, Gigartinales) reveals *Asterfilopsis* gen. nov. from the Southern Hemisphere. *Phycologia* 55: 543–554.

Calderon, M.S., G.H. Boo and S.M. Boo. 2016a. Correction to the paper "Morphology and phylogeny of *Ramirezia osornoensis* gen. & sp. nov. and *Phyllymenia acletoi* sp. nov. (Halymeniales, Rhodophyta) from South America". *Phycologia* 55: 610.

Calderon, M.S., K.A. Miller, T.H. Seo, and S.M. Boo. 2016b. Transfer of selected *Ahnfeltiopsis* (Phyllophoraceae, Rhodophyta) species to the genus *Besa* and description of *Schottera koreana* sp. nov. *Eur. J. Phycol.* 51: 431–443.

Calderon, M.S. and S.M. Boo. 2017. The Phyllophoraceae (Gigartinales, Rhodophyta) from Peru with descriptions of *Acletoa tarazonae* gen. & sp. nov. and *Gymnogongrus caespitosus* sp. nov.. *Phycologia* 56: 686–696.

Carbajal, P., N. Arakaki, P. Gil-Kodak., A. Gamarra and M.E. Ramírez. 2018. II- Chlorophyta & Phaeophyceae. *In: Macroalgas de la Costa Central del Perú.* UNALM, Lima, Perú. pp. 126.

Carbajal, P., A. Gamarra, N. Arakaki, P. Gil-Kodaka, M.E. Ramírez. 2019. *Guía para el reconocimiento en campo de las macroalgas del Callao*. Instituto del Mar del Perú, Callao, Perú. pp. 58.

Chacana, M.E., P.C Silva, F.F. Pedroche and K.A. Miller. 2016. *Codium* (Chlorophyta) species presented in the Galápagos Islands. *Hidrobiológica* 26: 151-159.

Cho, G.Y., N.G. Klochkova, T.N. Krupnova and S.M. Boo. 2006. The reclassification of *Lessonia laminarioides*(Laminariales, Phaeophyceae): *Pseudolessonia* gen. nov. *J. Phycol.* 42: 1289–1299.

Collins, F.S. 1915. Algae from the Chincha Islands. *Rhodora* 17: 89–96.

Dawson, E.Y. 1941. A review of the genus *Rhodymenia* with descriptions of new species*. Allan Hancock Pacific Exped.* 3: 123–181.

Dawson, E.Y., O.C. Acleto and N. Foldvik. 1964. The seaweeds of Peru. *Beihefte zur Nova Hedwigia* 13: 1–111.

Franco-León, J., C. Acleto-Osorio, V. Chambilla-Quispe and L. Sulca-Quispe. 1995. Estudio de las algas Rhodophyta del litoral de Tacna (Boca del Rio, Vila-Vila y Canepa). *Ciencia & Desarrollo*, 1: 5–11.

Gabrielson, P.W. 1982. Morphological studies of members of the tribe Agardhielleae (Solieriaceae, Rhodophyta) II. *Sarcodiotheca gaudichaudii* (Montagne) comb. nov. *Phycologia* 21: 86–96.

Gabrielson, P.W., T.B. Widdowson and S.C. Lindstrom. 2004. Keys to the seaweeds and seagrasses of Oregon and California. *Phycological Contribution* 6: 1–181.

González, A., J. Beltrán, L. Hiriart-Bertrand, V. Flores, B. de Reviers, J.A Correa and B. Santelices. (2012). Identification of cryptic species in the *Lessonia nigrescens* complex (Phaeophyceae, Laminariales). *J. Phycol*. 48: 1153–1165.

Grunow, A. 1867. Algae. *In:* (E. Fenzl, ed.) *Reise der österreichischen Fregatte Novara um die Erde in den Jahren 1857, 1858, 1859.* Botanischer Theil. Erster Band. Sporenpflanzen. pp. 104.

Guiry, M.D. and G.M. Guiry. 2019. AlgaeBase. World-wide electronic publication, National University of Ireland, Galway. http://www.AlgaeBase.org. (accessed September 19, 2019).

Guiry, M.D. and G.M. Guiry. 2020. AlgaeBase. World-wide electronic publication, National University of Ireland, Galway. <http://www.AlgaeBase.org>. (accessed March 10, 2020).

Howe, M.A. 1914. The marine algae of Peru. *Memoirs of the Torrey Botanical Club* 15: 1–185.

Hughey, J.R. and M.H. Hommersand. 2008. Morphological and molecular systematic study of *Chondracanthus* (Gigartinaceae, Rhodophyta) from Pacific North America. *Phycologia* 47: 124–155.

John, D.M., G.W. Lawson and G.K. Ameka, G.K. 2003. The marine macroalgae of the Tropical West Africa Subregion. *Beihefte zur Nova Hedwigia* 125: 1–217.

Juhl-Noodt, H. 1958. Beitrage zur kenntnis der peruanischen Meeresalgen 1. *Kieler Meeresforsch, Institut Meereskuste Universitet Kiel* 14: 167–174.

Kamiya, M., G.C. Zuccarello and J.A. West. 2003. Evolutionary relationships of the genus *Caloglossa* (Delesseriaceae, Rhodophyta) inferred from large-subunit ribosomal RNA gene sequences, morphological evidence and reproductive compatability, with description of a new species from Guatemala. *Phycologia* 42: 478–497.

Kützing, F.T. 1843. *Phycologia generalis*. Leipzig. pp. 458.

Kützing, F.T. 1849. *Species algarum*. Leipzig. pp. 922.

Kützing, F.T. 1851-1869. *Tabulae phycologicae*. Vol. 1-19. Nordhausen. 100 pls.

Kylin, H. and C. Skottsberg. 1919. Zur Kenntnis der subantarktischen und antarktischen Meeresalgen. II. Rhodophyceen. *In:* (O. Nordenskjöld, ed.) *Wissenschaftliche Ergebnisse der Schwedischen Südpolar-Expedition 1901-1903.* Vol. 4:2. Litographisches Institut des Generalstabs, Stockholm. pp. 1–88.

Lemoine, M. 1920. Botanische Ergebnisse der schwedischen Expedition nach Patagonien und dem Feuerlande 1907-1909. VII. Les Mélobésiées. *Kungliga Svenska Vetenskapsakademiens Handlingar* 61: 1-17.

Lewis, J.A. 1990. *Cryptonemia limensis* (Kützing) Lewis, comb. nov. (Halymeniaceae, Rhodophyta) from Peru. *Taxon* 39: 98–104.

Lindstrom, S.C., P.W. Gabrielson, J.R. Hughey, E.C. Macaya and W.A. Nelson. 2015. Sequencing of historic and modern specimens reveals cryptic diversity in *Nothogenia* (Scinaiaceae, Rhodophyte). *Phycologia* 54: 97–108.

Márquez-Corigliano, D., N. Arakaki, P. Gil-Kodaka, F. Tellier. 2019. Diversidad de especies de *Porphyra* y *Pyropia* (Bangiaceae, Rhodophyta) de Marcona (Ica, Perú) bajo la evidencia molecular. *Arnaldoa* 26: 623–642.

McClandless, E.L. and C.M. Vollmer. 1984. The nemathecium of *Gymnogongrus chiton* (Rhodophyceae, Gigartinales): immunochemical evidence of meiosis. *Phycologia* 23:119–123.

Montagne, C. 1837. Centurie de plantes cellulaires exotiques nouvelles. *Annales des Sciences Naturelles, Botanique, Seconde série* 8: 345–370.

Montagne, C. 1839. *Cryptogamie. Voyage dans l'Amerique Meridionale par M. Alcide D'Orbigny. Botanique, Sertum Patagonicum et Flora Boliviensis*. Vol. 7. pp. 110.

Montagne, C. 1842. Troisième centurie de plantes cellulaires exotiques nouvelles. Décades V, VI, VII et VIII. *Annales des Sciences Naturelles, Botanique, Seconde Série* 18: 241–282.

Montagne, C. 1846. Cryptogames cellulaires. Algues, lichens, hépatiques et mousses. *In:* (C. Gaudichaud, ed.) *Botanique. Voyage autour du monde exécuté sur la corvette La Bonite*. Vol. 1. pp. 355.

Montagne, C. 1861. Huitième centurie de plantes cellulaires nouvelles, tant indigènes qu'exotiques. Décades I et II. *Annales des Sciences Naturelles, Botanique, Serie* *4* 14: 167–185.

Peters, A.F. and D.G. Müller. 1986. Culture studies on the life history of *Myriogloea chilensis* (Mont.) Llaña (Phaeophyceae, Chordariales). *Bot. Mar.* 29: 43–48.

Peters, A.F., D. Marie, D. Scornet, B. Kloareg and J.M. Cock. 2004. Proposal of*Ectocarpus siliculosus* (Ectocarpales, Phaeophyceae) as a model organism for brown algal genetics and genomics. *J. Phycol.* 40: 1079–1088.

Pham-Hoàng, H. 1969. *Rong biên Viêtnam. Marine algae of South Vietnam*. Saigon. pp 558 .

Piccone, A. 1886. *Alghe del viaggio di circumnavegazione della Vettor Pisani*. R. Istituto Sordo‐muti, Genova. pp. 97.

Pilger, R. 1908. Kleinere Beitrage zur kenntnis der Meeresalgen Algen aus Perú und Chile. *Hedwigia* 48: 178–183.

Ramírez, P., J. De la Cruz and D. Torres. 2015. Biodiversidad en la isla Lobos de Tierra, región Lambayeque, setiembre 2015. *Inf. Inst. Mar. Perú* 46: 341–359.

Ramírez, M.E. and B. Santelices. 1991. Catálogo de las algas marinas bentónicas de la costa temperada del Pacífico de Sudamérica. *Monografías Biológicas* 5: 1–437.

Rodríguez, C.Y. and R.D. Otaíza. 2020. Morphological variability in a red seaweed: confirmation of co‐occurring f. *lessonii* and f. *chauvinii* in *Chondracanthus chamissoi* (Rhodophyta, Gigartinales). *J. Phycol.* 56: 469–480.

Rodríguez-Rodríguez, E.F., M.A. Fernández Honores, E. Alvítez Izquierdo, L.E. Pollack Velásquez, L.A. Luján Bulnes, C.W. Geldres Cruz and Y. Paredes Pizarro. 2018. Algas marinas del litoral de la región La Libertad, Perú. *Sci. Agropecu*. 9: 71–81.

Rojas-Gonzalez, B. and J. Afonso-Carrillo, J. 2004. Morfología y distribución de *Dipterosiphonia dendritica*, *D. rigens* y *D. reversa* en las islas Canarias (Rhodophyta, Rhodomelaceae). *Vieraea* 32: 135–150.

Roque-Sánchez, M., R. Oscco-Oscco and J. Ríos-Suarez. 2017. Aportación al conocimiento de las macroalgas del litoral costero de la Reserva Nacional San Fernando (Nasca, Perú). *AquaTIC* 47:1–9.

Santelices, B. and I.A. Abbott, I.A. 1985. *Gelidium rex* sp. nov. (Gelidiales, Rhodophyta) from central Chile. *In:* (I.A. Abbott and J.N. Norris, eds.) *Taxonomy of Economic Seaweds With Reference to some Pacific and Caribbean Species.* California Sea Grant College Program, La Jolla. pp. 33-36.

Santelices, B. and S. Montalva. 1983. Taxonomic studies on Gelidiaceae (Rhodophyta) from central Chile. *Phycologia* 22: 185–196.

Saunders, G.W. and K.V. Lehmkuhl. 2005). Molecular divergence and morphological diversity among four cryptic species of *Plocamium* (Plocamiales, Florideophyceae) in northern Europe. *Eur. J. Phycol.* 40: 293–312.

Schneider, C.W. and W.J. Wynne. 1991. Lectotypification of *Sebdenia flabellata* (J. Agardh) Parkinson (Gigartinales, Rhodophyta). *Taxon* 40: 471–474.

Silva, P.C. (2019). *Index Nominum Algarum*, *University Herbarium*. University of California, Berkeley, Available at: http://ucjeps.berkeley.edu/INA.html (Accessed 19 September 2019).

South, G.R. and P.A. Skelton. 2003. Catalogue of the marine benthic macroalgae of the Fiji Islands, South Pacific. *Aust. Syst. Bot.* 16: 699–758.

Suárez, S. 2018 Filogeografía del alga *Chondracanthus chamissoi* (Gigartinaceae, Rhodophyta) en la costa peruana usando marcadores moleculares. Dissertation. Universidad Nacional Agraria La Molina. pp. 77

Suhr, J.N. von. 1840. Beiträge zur Algenkunde. Nr. 3. *Flora* 22: 65–75.

Taylor, W.R. 1947. Algae collected by the "Hassler", "Albatross" and Schmitt expeditions. III. Marine algae from Peru and Chile. *Papers of the Michigan Academy of Sciences, Arts and Letters* 31: 57–90.

Tsuda, R.T. 2004. *Dictyota* (Phaeophyceae) from Micronesia. *In:* (I.A. Abbot and K.J. McDermid, eds.) *Taxonomy of economic seaweeds with reference to the Pacific and other locations.* Vol. 9. University of California, La Jolla, CA. pp. 41–56.

Ueda, S. 1932. Systematic study of the genus *Porphyra* in Japan. *Suiko-Kenkyu-Kokoku* 28: 1–45.

West, J.A. 1991. New Records of the Marine Algae from Perú. *Bot. Mar.* 34: 459–464

Williamson C., Y. Christopher, A.G. Briscoe and J. Brodie. 2016. Complete mitochondrial genome of the geniculate calcified red alga, *Corallina officinalis* (Corallinales, Rhodophyta). *Mitochondrial DNA B* 1: 326–327.

Wynne, M.J. 1999. Concerning the names of two phaeophycean algae: *Colpomenia durvillei* (Bory) M.E. Ramírez and *Utriculidium durvillei* Skottsberg. *Cryptogam., Algol.* 20: 289–293.

Wynne, M.J. 2014. *The red algal families Delesseriaceae and Sarcomeniaceae*. Koeltz Scientific Books, Königstein. pp. 326.

Wynne, M.J. 2019. Validation of *Amphiroa peruana* (Lithophyllaceae, Rhodophyta) by W.R.Taylor (1945) and its lectotypification. *Notulae Algarum* 119: 1-5.

Wynne, M.J. and J .N. Norris. 1976. The genus *Colpomenia* Derbes et Solier (Phaeophyta) in the Gulf of California. *Smithsonian Contribution to Botany* 35: 1–18.

Yang, E.C., A.F. Peters, H. Kawai, R. Stern, T. Hanyuda, I. Bárbara, D.G. Müller, M. Strittmatter, W.F. Prud'homme van Reine and F.C. Küpper. 2014. Ligulate *Desmarestia* (Desmarestiales, Phaeophyceae) revisited: *D. japonica* sp. nov. and *D. dudresnayi* differ from *D. ligulata*. *J. Phycol.* 50: 149–166.

Yoshida, T. 1997. Japanese marine algae: new combinations, new names and new species. *Phycol. Res.* 45: 163-167.
